# Supplementary material for: A Simple “Blood-Saving Bundle” Reduces Diagnostic Blood Loss and the Transfusion Rate in Mechanically Ventilated Patients
Source: PLoS One. 2015 Sep 30;10(9):e0138879. doi: 10.1371/journal.pone.0138879 (PMC4589283; doi:10.1371/journal.pone.0138879)
Supplement: S1 Dataset — (XLS) [file pone.0138879.s001.xls]

## Sheet: BSBSupplementaryMinimalDataFile
Patient ID		Patient Characteristics			Length of ICU Stay			Total Hospital Stay	Blood Loss																			Hemoglobin Concentrations and Blood Transfusions (packs of RBC)
Case Number	Study Period	Patient Age	Sex	SAPS II	ICU Days	Ventilation Days	Non-Ventilation Days	Days	Blood loss Admission	Blood loss FU 1	Blood loss FU 2	Blood loss FU 3	Blood loss FU 4	Blood loss FU 5	Blood loss FU 6	Blood loss FU 7	Blood loss FU 8	Blood loss FU 9	Blood loss FU 10	Blood loss FU 11	Blood loss FU 12	Blood loss FU 13	Blood loss FU 14	Blood loss FU 15	Blood loss AddDays	Mean blood loss per ICU day	Total blood loss per ICU stay	Hb Baseline	BT baseline	Hb FU 1	BT FU 1	Hb FU 2	BT FU 2	Hb FU 3	BT FU 3	Hb FU 4	BT FU 4	Hb FU 5	BT FU 5	Hb FU 6	BT FU 6	Hb FU 7	BT FU 7	Hb FU 8	BT FU 8	Hb FU 9	BT FU 9	Hb FU 10	BT FU 10
C1	Before (2008)	78	male	82	7	4	3	40	74.3	44.6	44.6	44.6	24.1	24.1	15.9											38.8857	272.2	15.5		14		12.9		13		13		13.9		13.8
C2	Before (2008)	76	female	47	27	17	10	75	33.9	48.7	53.9	46.8	45.7	79.5	53.1	44.6	45.7	40.5	40.5	44.6	28.2	70.2	70.5	36.4	429.7	44.9074	1212.5	11.1		9.2		8.3		8.5		8.2		8.5		7.6	2	9.4		9.7		8.5		9.5
C3	Before (2008)	56	male	55	11	9	2	18	53.1	36.4	40.5	32.8	32.3	36.4	32.3	32.3	40.5	24.6	25.6							35.1636	386.8	13.2		13.5		12		11.7		11.8		11.4		11.4		13.3		13.8		12.7		12.6
C4	Before (2008)	62	female	57	9	4	5	28	8.2	70.2	40.5	48.7	36.4	28.2	70.2	36.4	20									39.8667	358.8	10.5		10.3		9.8		10		10.3		9.6		9.2		8.8		8.5
C5	Before (2008)	52	male	79	12	8	4	42	36.4	73.3	40.5	48.7	52.8	57.2	48.7	44.6	40.5	40.5	24.1	15.9						43.6	523.2	9.3		9		8.6		8.1		8.2		8.1	2	10.3		9.3		9.9		9.4		9.1
C6	Before (2008)	75	male	62	16	15	1	31	58	36.4	83.5	44.6	44.6	66.1	62	40.5	40.5	44.6	40.5	48.7	28.2	28.2	48.7	40.5		47.225	755.6	15.5		12.9		13.1		12.6		12.6		12.3		12		11.3		12.1		11.3		11.8
C7	Before (2008)	46	male	75	9	7	2	25	49	77.4	56.9	32.3	40.5	40.5	36.4	28.2	32.3									43.7222	393.5	16.7		14.4		12.4		11.4		10.9		10.6		10.2		10.5		11.3
C8	Before (2008)	75	male	64	9	8	1	20	40.5	44.6	82.8	36.4	32.3	48.7	56.9	61.3	24.1									47.5111	427.6	12.5		9.5		8.8		8.7		8.3		8.1		8		7.6	2	10.8
C9	Before (2008)	60	male	52	14	8	6	55	78.4	113.4	65.1	72.8	48.7	44.6	74.3	44.6	48.7	36.4	40.5	24.1	20	28.2				52.8429	739.8	12		12		10.3		9.6		9.8		9.7		9.5		9		9.1		10.3		10.8
C10	Before (2008)	87	female	70	5	3	2	26	12.3	28.2	37.5	32.3	36.4													29.34	146.7	11.5		10.5		10.2		10.2		10.3
C11	Before (2008)	58	male	75	7	5	2	16	66.1	48.7	48.7	40.5	70.2	62	4.1											48.6143	340.3	9.8		9.3		9.5		9.2		9.7		9.5		9.8
C12	Before (2008)	41	male	41	15	5	10	67	20.5	40.5	41	44.6	40.5	40.5	32.3	32.3	32.3	24.6	49.7	24.1	28.2	24.1	20			33.0133	495.2	11.1		11.9		10.7		10.2		9.9		9.8		10.2		9.8		10.3		10.2		10.7
C13	Before (2008)	75	female	58	17	15	2	34	65.1	56.9	52.8	52.8	40.5	40.5	44.6	40.5	49.2	44.6	32.8	44.6	44.6	40.5	52.8	56.9	32.3	46.5882	792	13.6		12.5		11.9		11.2		11.4		11.5		10.8		10.5		10		9.5		10
C14	Before (2008)	67	male	62	29	7	22	48	24.6	44.6	40.5	32.3	48.7	44.6	56.9	44.6	52.8	44.6	44.6	40.5	44.6	40.5	36.4	32.3	490.1	40.1103	1163.2	12		11.1		10.7		11.1		11.5		11.2		11.4		11		10.1		11.9		10.8
C15	Before (2008)	71	female	76	6	4	2	18	20.5	40.5	44.6	40.5	40.5	11.8												33.0667	198.4	10.2		10.3		10.4		9.5		11.9		13.5
C16	Before (2008)	71	male	63	8	4	4	8	66.1	48.7	44.6	56.9	44.6	28.2	36.4	15.9										42.675	341.4	14		11.5		10.3		9.6		10.3		11.3		12		11.7
C17	Before (2008)	44	male	60	20	11	9	20	57.9	52.8	52.8	52.8	74.3	86.6	52.8	74.3	52.8	48.7	65.1	70.2	48.7	40.5	40.5	36.4	129.2	51.82	1036.4	14.4		13.3		13		12.6		12.6		13		12.7		12.2		11.9		11.3		11.2
C18	Before (2008)	69	male	56	19	14	5	20	24.1	52.8	69.2	40.5	42	65.1	44.6	56.9	44.6	82.8	56.9	57.2	36.4	65.4	65.1	60.5	130.7	52.3579	994.8	14.4		13.1		11.3		10.7		9.7		9.3		9		8.1		8.1		7.9	2	7.5
C19	Before (2008)	30	male	71	36	19	17	36	94.3	76.9	65.4	70.2	56.9	56.9	56.9	56.9	69.2	44.6	44.6	44.6	56.9	52.8	40.5	44.6	562.4	41.5167	1494.6	10.2		9		8	2	6.6		7.5	2	8.9		8.2		8.1		7.9		7.8	2	9.2
C20	Before (2008)	69	male	55	23	11	12	40	48.7	44.6	56.9	66.1	40.5	36.4	48.7	36.4	40.5	40.5	66.1	44.6	40.5	56.9	48.7	44.6	197.4	41.6565	958.1	13.1		12.9		12.5		11.9		12		10.8		10.7		11.3		11		10.2		10
C21	Before (2008)	78	male	68	6	5	1	14	70	52.8	48.7	40.5	52.8	24.1												48.15	288.9	15.6		12.9		12.6		12.4		13.7		12.8
C22	Before (2008)	59	female	76	24	4	20	38	40.8	44.6	62	40.5	40.5	44.6	52.8	57.2	24.1	28.2	40.5	36.4	36.4	32.3	36.4	32.3	127.2	32.3667	776.8	10.2		9.4		9.4		8.7		8.6		8.4		8.3		7.7	2	9.5		10.4		10
C23	Before (2008)	82	male	68	28	14	14	28	20.5	68.8	36.4	48.7	52.8	74.3	44.6	70.2	36.4	40.5	66.1	74.6	56.9	48.7	48.7	40.5	559.5	49.5786	1388.2	10		9	2	9.3		8.6		9.2		9.5		9.7		9.4		8.8		9.4		8.7
C24	Before (2008)	48	female	53	19	9	10	31	53.8	121	61	69.2	52.8	56.9	69.2	44.6	44.6	40.5	40.5	44.6	49	57.9	40.5	20.5	80.8	49.8632	947.4	14.4		14		11.9		9.9		9.6		9.6		9.3		9.7		9.9		8.9		9.1
C25	Before (2008)	78	male	44	7	5	2	39	24.6	61.3	53.1	62	48.7	44.6	66.1											51.4857	360.4	10.3		9.9		9.7		10.8		11.2		11.3		10.3
C26	Before (2008)	78	female	67	17	9	8	51	48.7	78.4	40.5	44.6	48.7	40.5	40.5	40.5	40.5	40.5	32.3	13.3	25.1	20	24.1	20	11.8	35.8824	610	12.1		11.9		11.2		10.7		10.3		10.3		10.4		10.8		10.9		11.2		11.6
C27	Before (2008)	62	male	37	7	3	4	13	37.9	90.2	61	48.7	52.3	24.1	15.9											47.1571	330.1	9.2	2	9.3		9.9		10.5		10.7		12		11.8
C28	Before (2008)	29	female	44	7	5	2	19	40.5	36.4	24.1	24.1	36.4	48.7	32.3											34.6429	242.5	12.1		10.2		10.2		9.9		10.2		9.4		10.3
C29	Before (2008)	57	female	61	10	6	4	18	40.5	36.4	46.5	40.5	32.3	40.5	44.6	40.5	40.5	32.3								39.46	394.6	9		8.5		7.6	2	10.7		9		9		8.9		8.9		9.3		9.8
C30	Before (2008)	57	male	82	38	13	25	43	125.7	117.3	81.8	58.3	45.7	69.2	65.4	48.7	66.1	44.6	52.8	66.1	42	61.3	70.2	57.9	810.6	49.5711	1883.7	9.2		8.6	2	8.6		8.8	1	9.1		9		9.4	2	7.9		8.3		8.5		8.6
C31	Before (2008)	25	female	19	16	5	11	38	24.6	33.8	32.3	28.2	36.4	40.5	40.5	40.5	36.4	44.6	36.4	45.6	24.1	35.9	20	15.9		33.4812	535.7	11.9		11.4		11.4		11.7		11.4		10.9		11.2		10.7		10.5		11		10.7
C32	Before (2008)	69	female	70	15	12	3	25	48.7	40.5	44.6	40.5	40.5	52.8	44.6	44.6	82.5	58.4	70.2	48.7	44.6	40.5	24.1			48.3867	725.8	13.1		12		10.9		11.7		11.4		12		11.3		11.7		11.9		11		10.8
C33	Before (2008)	63	male	52	31	4	27	31	86.6	52.8	32.3	65.1	52.8	61	52.8	44.6	40.5	48.7	48.7	48.7	56.9	44.6	49.5	44.6	607.5	46.3774	1437.7	18.2		15.3		14.4		14.9		14.7		14.2		14.2		13.7		13.3		13.7		13.7
C34	Before (2008)	78	female	76	7	5	2	7	82.8	52.8	48.7	56.9	61	48.7	15.9											52.4	366.8	12.5		10.5		10		10.4		10		10.7		11.4
C35	Before (2008)	81	female	82	11	8	3	40	28.2	65.1	40.5	53.9	36.4	36.4	65.1	57.2	48.7	32.3	15.9							43.6091	479.7	9.5		9.9		9.9		9.3		9.5		9.4		8.6		8.6	2	10.2		10.3		11.1
C36	Before (2008)	50	male	76	9	6	3	35	70.2	44.6	40.5	52.8	66.1	36.4	44.6	24.1	31.8									45.6778	411.1	13.5		11.5		10.8		11.7		12.3		10.7		9.7		10.7		10.9
C37	Before (2008)	61	male	42	21	7	14	55	40.8	48.7	40.5	48.7	44.6	50.5	52.8	44.6	40.5	53.9	52.8	52.8	44.6	40.5	32.3	36.4	149.2	41.6286	874.2	9.5		8.9		8.6		8.6		8.3		7.8	2	9.3		10		8.8		8.4		9
C38	Before (2008)	55	male	51	9	7	2	9	20	40.5	32.3	40.5	36.4	44.6	36.4	36.4	28.2									35.0333	315.3	9.5		10.2		10		10.2		9.6		10		9.7		10.6		10.9
C39	Before (2008)	28	female	11	8	6	2	13	49.7	70.2	48.7	44.6	46.1	40.5	61	36.4										49.65	397.2	13.8		11.6		12		10.7		9.8		9		9.2		9.3
C40	Before (2008)	81	female	72	13	11	2	21	40.8	40.5	52.8	32.8	69.7	32.3	40.5	57.9	40.5	40.5	57.2	40.5	20					43.5385	566	11.6		10		9.7				10.3		9.4		9		9.1		9.2		8.3		7.9	2
C41	Before (2008)	67	female	39	15	6	9	20	56.9	48.7	40.5	48.7	44.6	40.5	90.7	52.8	44.6	24.1	36.4	36.4	28.2	11.8	15.9			41.3867	620.8	14.6		12.4		12.3		11.4		11.4		11.3		11.1		10.5		11.8		10.3		10.3
BSB1	After (2010)	68	male	28	17	8	9	17	34.7	37.6	14.4	17.7	15.6	15.6	15.6	12.9	11.7	6.4	5.2	37.1	38.3	21.3	15.6	13.2	10.8	19.0412	323.7	14		13.7		13.7		12.5		10.9		11.6		11.1		11.8		11.2		10.9		10
BSB2	After (2010)	67	male	49	9	8	1	20	12	15.6	40.7	14.4	11.2	13.2	12.4	16	3.6									15.4556	139.1	13.7		13.3		13		12		11.4		12.3		12		12.5		14.4
BSB3	After (2010)	68	male	62	11	10	1	17	59.8	18	14.4	14.4	14.4	14.4	11.2	35.9	13.2	14.4	10.8							20.0818	220.9	12.6		10.9		10.6		11.2		11.5		11.8		12.7		13.8		13.3		12.5		13.2
BSB4	After (2010)	75	male	42	15	5	10	17	31.1	15.6	8.4	22.8	16.8	16.8	15.6	17.2	13.2	12.4	13.2	10	8.8	15.6	7.6			16.0786	225.1	11.3		10.5		10.6		10.2		10		10.3		9.8		10.1		9.6		10.4		10.9
BSB5	After (2010)	71	female	43	12	8	4	27	7.2	10.8	15.6	16.8	13.2	12.4	16.8	13.2	8.4	14.4	1.2	8.3						11.525	138.3	11.3		11.1		11.2		10.6		11.4		12.2		11.7		11		10.9		10.5		10.2
BSB6	After (2010)	72	male	55	4	4	0	17	11.5	20.5	11.2	14.1														14.325	57.3	14.7		13.6		15.1		14.3
BSB7	After (2010)	32	male	55	7	6	1	9	18.1	14.4	12	14.4	13.2	13.2	11.3											13.8	96.6	13.9		12.1		11.6		11.5		11.4		11.2		11.3
BSB8	After (2010)	89	female	82	12	11	1	12	43.1	15.6	16.9	13.6	13.6	13.2	13.2	11.2	14.8	15.6	17.2	14.4						16.8667	202.4	14.3		12.2		12.1		12		10.9		11.3		10.7		11.6		11		11.3		11.6
BSB9	After (2010)	56	female	63	6	6	0	21	9.6	15.6	16.8	13.2	14.4	11.2												13.4667	80.8	11.5		10.3		9.8		9.7		10		9.8
BSB10	After (2010)	27	male	39	13	11	2	14	15.7	14.4	34.7	13.2	14.4	10.8	8.8	10.8	14.4	9.6	8.8	12	9.6					13.6308	177.2	14.2		13.9		11.3		9.9		10.5		10.3		10.3		9.9		10.4		9.6		9.5
BSB11	After (2010)	58	male	73	17	13	4	19	15.6	22.8	16.8	18	14.4	14.4	18.5	13.2	18.9	14.4	14.4	14.4	18	19.2	15.6	43.1	10.8	17.7941	302.5	15.4		13.6		11.9		11.3		10.3		10.2		9.7		10.2		10		9.8		10.6
BSB12	After (2010)	69	male	76	15	9	6	18	12	38.3	15.2	12	32.3	13.2	12	8.8	15.6	9.6	8.4	6.4	5.2	6	9.7			13.6467	204.7	15.2		14.2		12.5		12.3		11.8		11.4		11.1		11.1		11.3		11.5		12
BSB13	After (2010)	82	male	58	21	14	7	43	35.9	14.4	16.8	39.5	14.4	34.7	12	13.2	14.4	12	13.2	8.8	8.4	2	2	2	10	12.081	253.7	9.5	2	7.3		7.5	2	9.6		9.3		8.7		8.2		8.1		8.3		8.3		8.5
BSB14	After (2010)	73	male	59	7	7	0	16	7.2	34.7	12	8.8	11.2	12	9.6											13.6429	95.5	13.7		13.5		10.6		12.1		11.6		11.3		11.1
BSB15	After (2010)	74	male	60	34	16	18	47	3.3	15.6	10.8	12	14.4	14.4	35.9	15.6	15.6	14.4	14.4	15.6	14.4	14.4	15.6	18	299.8	16.0059	544.2	12.1		12		11.8		11.6		11.9		11.7		11.3		12		11.2		12.1		11.2
BSB16	After (2010)	60	male	77	14	11	3	23	6	12	12	12.4	11.2	12	13.2	12.4	13.2	13.2	14.4	15.6	18	8.4				12.4286	174	13.4		14.8		13.5		11.3		10.8		10.1		11.1		10.9		11.1		11.6		11.6
BSB17	After (2010)	73	female	71	10	10	0	21	8.4	19.2	15.6	13.2	14.4	12	13.2	13.2	40.7	9.6								15.95	159.5	11.3		11.1		10.5		10.9		9.9		10.1		9.2		9.9		9.5		10.1
BSB18	After (2010)	77	male	67	5	4	1	26	22.8	16.8	12	14.4	6.4													14.48	72.4	10.3		9.2		9.1		8.7		8.9
BSB19	After (2010)	48	female	64	8	7	1	18	16.8	41.9	21.2	12	14.4	14.4	14.4	9.6										18.0875	144.7	10.6		10.9		10.6		9.7		9		8.8		8.8		8.7
BSB20	After (2010)	50	female	53	16	10	6	25	14.4	14.4	15.6	13.6	14.4	14.4	15.6	12	9.6	12	15.6	12	14.4	8.8	14.4	13.2		13.4	214.4	16.3		13.4		12.2		10.4		9.8		8.1		10.5		10.8		10.4		10.3		10
BSB21	After (2010)	52	male	63	17	12	5	18	18.9	41.9	15.6	10	35.9	12.4	15.6	11.2	34.7	12	14.4	14.8	12	12	8.8	7.2	7.2	16.7412	284.6	14.9		14		11.9		12.2		12.2		12		12		12.6		12		11.6		10.9
BSB22	After (2010)	72	male	80	10	9	1	10	13.2	44.3	39.5	16.8	12	15.6	14.4	12.4	14.4	9.6								19.22	192.2	15		15.9		15.7		13.2		11.6		11.7		11.9		12.4		11.9		12.9
BSB23	After (2010)	62	male	49	8	6	2	39	33.5	13.2	14.4	34.7	10.8	12	14.4	9.6										17.825	142.6	12.7		10.1		10.3		9.1		9.4		9.4		9.8		9.6
BSB24	After (2010)	86	male	66	6	5	1	23	2.4	14	21.7	8.4	8.4	7.2												10.35	62.1	12.4		9.8		9.8		9.4		8.8		8.9
BSB25	After (2010)	79	male	78	5	5	0	14	10.8	13.2	14.4	14.4	10.8													12.72	63.6	11.7		10.8		9.7		8.7		9.2
BSB26	After (2010)	71	male	66	29	16	13	29	31.1	21	13.2	14.4	14.4	14.4	13.2	12	14.4	14.4	14.4	16.8	16.4	12	13.2	55	199.2	16.8793	489.5	11.4		10.8		10.3		10.7		9.9		10.2		10.1		10.1		9.6		8.7		9
BSB27	After (2010)	55	female	55	11	9	2	24	12	33.5	14.4	12	14.4	12	13.2	8.8	12.4	7.6	8.4							13.5182	148.7	12		10.5		10.1		9.9		10.3		10.6		10.5		10.3		9.8		9.7		10
BSB28	After (2010)	75	female	74	7	7	0	31	11.2	14.4	12	11.2	16.8	12.4	10											12.5714	88	12.3		11.2		10.1		10.7		9.6		9.7		9.7
BSB29	After (2010)	69	female	62	8	6	2	29	19.3	34.7	12.4	13.2	12	19.2	14.8	9.6										16.9	135.2	13.3		13		12.3		11.2		10.6		10.2		11.2		11.6
BSB30	After (2010)	73	male	83	9	8	1	28	20.5	12	13.2	13.6	14.4	11.2	14.4	15.6	7.6									13.6111	122.5	14		14.4		11.9		10.6		10.3		9.9		10.2		10.2		10.1
BSB31	After (2010)	41	female	56	6	4	2	6	35.9	15.6	14.4	12.4	13.2	6												16.25	97.5	13.1		12.2		10.8		10.5		11.1		11.7
BSB32	After (2010)	45	male	77	16	9	7	17	23.2	27.3	14.4	12	14.4	11.2	14.4	15.6	18	16	12	7.2	5.2	7.2	7.2	6		13.2063	211.3	16.5		14.6		11.7		10.9		11.8		11.1		10.4		10.6		10.3		9.3		9.1
BSB33	After (2010)	43	male	94	9	6	3	41	44.4	18	14.4	13.2	12	15.6	14.4	14.8	9.6									17.3778	156.4	12.5		11.1		11.2		10.7		10.7		10.2		10.3		10.2		9.7
BSB34	After (2010)	78	female	62	11	9	2	20	14.4	16.8	22.8	11.2	12.4	35.6	14.4	15.3	15.6	8.4	6.4							15.7545	173.3	12.9		10.5		10		9		8.4		8.9		9.8		9.3		10.2		10.3		9.8
BSB35	After (2010)	57	female	56	9	8	1	23	32.3	14.4	12	17.2	11.2	13.2	10	14.8	7.6									14.7444	132.7	13.4		11.6		10.4		9.1		8.8		8.2		8.3		8.3		8.8
BSB36	After (2010)	68	male	66	15	14	1	35	10.9	16.8	37.1	14.4	12.4	13.6	13.2	15.6	15.6	13.2	13.2	11.2	12	15.6	6.4			14.7467	221.2	15.4		13.8		13.1		12.4		13.1		12		11.2		10.2		9.8		10.2		10.2
BSB37	After (2010)	73	male	79	7	7	0	7	13.2	14.4	14.4	12	13.6	10	7.6											12.1714	85.2	14.1		13.1		11.8		10.6		10.2		10.4		11.4
BSB38	After (2010)	69	female	54	4	3	1	45	15.6	14.4	16.8	7.6														13.6	54.4	14.7		12		9.7		9.6
BSB39	After (2010)	68	female	86	10	6	4	52	16.1	14	12	22.4	12.8	12	13.2	7.2	9.6	8.4								12.77	127.7	10.7		12		11.7		11.4		10.7		10.7		10.3		10.9		9.7		11
BSB40	After (2010)	51	male	45	8	7	1	14	52.7	18	25.2	16.8	14.8	13.2	14.4	8.8										20.4875	163.9	11.6		9.3		8.9		9.2		8.7		8.6		9.2		9.8
BSB41	After (2010)	66	male	57	9	9	0	53	2.4	10.8	35.9	13.2	20.5	13.2	10	12	10									14.2222	128	15		12.2		12.3		11.5		11.6		11.3		11.4		11.5		11.5
BSB42	After (2010)	67	female	22	10	8	2	33	9.6	20.4	18	16.5	13.2	14.4	14.4	15.6	16.8	20.4								15.93	159.3	11.9		11.7		10.1		9.8		8.7		8.4		8.5		7.7	2	9.5		9.3
BSB43	After (2010)	77	male	97	6	3	3	29	39.5	20	15.6	10.8	12	9.6												17.9167	107.5	10.4		11.9		11.2		10.7		10.5		10.6
BSB44	After (2010)	38	male	83	7	5	2	13	10.8	19.2	18	12.4	12.4	13.2	8.8											13.5429	94.8	9.2		9.7		7.8		8.7		8.2		8.8		8.6
BSB45	After (2010)	77	male	45	8	5	3	23	15.6	35.9	18	15.6	19.2	11.2	5.2	7.2										15.9875	127.9	12.8		10.8		10.8		11.5		10.7		11		10.5		11.3
BSB46	After (2010)	67	male	43	8	3	5	26	58.6	20.4	13.2	14.4	16	8.8	7.2	7.2										18.225	145.8	10.9		11		9.6		8.9		9.6		9.4		9.8		10.1
BSB47	After (2010)	37	male	52	15	12	3	15	31.1	14.4	13.6	14.4	13.6	14.4	12	12	13.2	10.8	9.6	6.4	6.4	6.4	5.2			12.2333	183.5	12.8		11.1		10.7		11.4		10.7		11.9		11.5		10.7		10.8		10.5		10.4
BSB48	After (2010)	40	female	64	5	5	0	17	8.4	15.6	13.2	13.2	9.6													12	60	11.7		10.5		10.1		10		9.9
BSB49	After (2010)	73	male	73	6	6	0	12	20.4	16.8	13.2	10	11.2	9.6												13.5333	81.2	14.2		13.3		13.9		12.1		12.8		11.4
BSB50	After (2010)	46	male	64	27	23	4	27	13.2	13.2	14.4	16.8	13.2	12	17.6	12	12.4	13.2	18	15.6	37.1	14.4	13.2	14.4	136.8	14.3519	387.5	9.1		8.5		8.8		8.8		8.9		9.3		8.7		9		8.4		9		8.3
[truncated: 14 more columns]
